# Supplementary material
Source: PubMed Central journal article supplement (PMC7469122)
Supplement: ao0c01547_si_001.pdf [file ao0c01547_si_001.pdf]

## Electronic Supplementary Material

# A New Approach to Dehydration of xylose to 2-furfuraldehyde Using a Mesoporous Niobium-based Catalyst

*José B. Gabriel<sup>1-2</sup>. Victor Oliveira<sup>1</sup>. Talita Souza<sup>2</sup>. Izabela Padula<sup>2</sup>. Luiz C. A. Oliveira<sup>2</sup>. Leandro V. A. Gurgel<sup>1</sup>. Bruno E. L. Baêta<sup>1</sup>. Adilson C. Silva<sup>1\*</sup>*

<sup>1</sup> Laboratory of Technological and Environmental Chemistry. Department of Chemistry. Institute of Exact and Biological Sciences (ICEB). Federal University of Ouro Preto. Campus Universitário Morro do Cruzeiro. Bauxita. 35400-000 Ouro Preto. Minas Gerais. Brazil

<sup>2</sup> Department of Chemistry. Institute of Exact Sciences (ICEX). Federal University of Minas Gerais (UFMG). Avenida Antônio Carlos. 6627. 31270-901 Belo Horizonte. Minas Gerais. Brazil.

\*Corresponding author: A. C. da Silva; E-mail address: [adilsonqui@ufop.edu.br](mailto:adilsonqui@ufop.edu.br)/  
[adilsonufla@gmail.com](mailto:adilsonufla@gmail.com); Phone number: +55 31 3559-1934.

Tables: 04

**Supplementary Table 1.** Regression coefficients for the responses evaluated in the 2<sup>3</sup> experimental design.

| <b>Yield (%)</b>       | <b>Regressn<br/>Coeff.</b> | <b>Std.Err.<br/>Pure Err</b> | <b>t(2)</b> | <b>p-value</b>      | <b>-95%<br/>Cnf.Limt</b> | <b>+95%<br/>Cnf.Limt</b> |
|------------------------|----------------------------|------------------------------|-------------|---------------------|--------------------------|--------------------------|
| <b>Mean/Interc.</b>    | -164.677                   | 45.06818                     | -3.65395    | 0.067413            | -358.590                 | 29.23576                 |
| (1) <i>T</i> (°C)(L)   | 1.813                      | 0.50669                      | 3.57756     | 0.070024            | -0.367                   | 3.99284                  |
| (2) <i>t</i> (min)(L)  | 0.171                      | 0.10624                      | 1.60764     | 0.249168            | -0.286                   | 0.62792                  |
| (3) <i>CXR</i> (%) (L) | 0.062                      | 0.13972                      | 0.44714     | 0.698535            | -0.539                   | 0.66363                  |
| <i>T</i> (°C)(Q)       | -0.004                     | 0.00140                      | -3.01523    | 0.094636            | -0.010                   | 0.00180                  |
| 2L by 3L               | -0.001                     | 0.00056                      | -1.90745    | 0.196703            | -0.003                   | 0.00133                  |
| 1L by 3L               | -0.001                     | 0.00073                      | -1.00189    | 0.421923            | -0.004                   | 0.00241                  |
| 1L by 2L               | -0.000                     | 0.00056                      | -0.84347    | 0.487764            | -0.003                   | 0.00192                  |
| <b>Conversion (%)</b>  | <b>Regressn<br/>Coeff.</b> | <b>Std.Err.<br/>Pure Err</b> | <b>t(2)</b> | <b>p-value</b>      | <b>-95%<br/>Cnf.Limt</b> | <b>+95%<br/>Cnf.Limt</b> |
| <b>Mean/Interc.</b>    | -732.552                   | 20.20425                     | -36.2573    | 0.000760            | -819.484                 | -645.620                 |
| (1) <i>T</i> (°C)(L)   | 7.776                      | 0.22715                      | 34.2309     | 0.000852            | 6.798                    | 8.753                    |
| (3) <i>CXR</i> (%) (L) | 1.177                      | 0.06264                      | 18.7887     | 0.002821            | 0.907                    | 1.446                    |
| (2) <i>t</i> (min)(L)  | 0.563                      | 0.04763                      | 11.8240     | 0.007077            | 0.358                    | 0.768                    |
| <i>T</i> (°C)(Q)       | -0.018                     | 0.00063                      | -29.1661    | 0.001173            | -0.021                   | -0.016                   |
| 1L by 3L               | -0.006                     | 0.00033                      | -17.0717    | 0.003414            | -0.007                   | -0.004                   |
| 1L by 2L               | -0.002                     | 0.00025                      | -9.6939     | 0.010475            | -0.003                   | -0.001                   |
| 2L by 3L               | 0.000                      | 0.00025                      | 0.5492      | 0.638018            | -0.001                   | 0.001                    |
| <b>Selectivity (%)</b> | <b>Regressn<br/>Coeff.</b> | <b>Std.Err.<br/>Pure Err</b> | <b>t(2)</b> | <b>p-<br/>value</b> | <b>-95%<br/>Cnf.Limt</b> | <b>+95%<br/>Cnf.Limt</b> |
| Mean/Interc.           | 306.5686                   | 46.98692                     | 6.5246      | 0.022694            | 104.4002                 | 508.7370                 |
| (1) <i>T</i> (°C)(L)   | -2.3608                    | 0.52826                      | -4.4690     | 0.046598            | -4.6338                  | -0.0879                  |
| (3) <i>CXR</i> (%) (L) | -1.7158                    | 0.14567                      | -11.7790    | 0.007130            | -2.3426                  | -1.0891                  |
| 1L by 3L               | 0.0074                     | 0.00076                      | 9.7094      | 0.010442            | 0.0041                   | 0.0107                   |
| <i>T</i> (°C)(Q)       | 0.0051                     | 0.00146                      | 3.4756      | 0.073742            | -0.0012                  | 0.0113                   |
| (2) <i>t</i> (min)(L)  | -0.0037                    | 0.11076                      | -0.0334     | 0.976409            | -0.4803                  | 0.4729                   |
| 2L by 3L               | -0.0012                    | 0.00058                      | -2.0215     | 0.180603            | -0.0037                  | 0.0013                   |
| 1L by 2L               | 0.0003                     | 0.00058                      | 0.5041      | 0.664239            | -0.0022                  | 0.0028                   |

**Supplementary Table 2.** ANOVA results for response yield (%) evaluated in the 2<sup>3</sup> experimental design.

| Factor                   | ANOVA; Var: Yield (%); $R^2=0.93033$ ; $R^2_{adj}:0.76777$ (Spreadsheet5) 3 factors. 1 Blocks. 11 Runs; MS Pure Error=10.9099 DV: Yield (%) |    |          |          |                  |
|--------------------------|---------------------------------------------------------------------------------------------------------------------------------------------|----|----------|----------|------------------|
|                          | SS                                                                                                                                          | df | MS       | F        | p-value          |
| (1) <i>T</i><br>(°C)(L)  | 662.116                                                                                                                                     | 1  | 662.1161 | 60.68947 | 0.016081         |
| <i>T</i> (°C)(Q)         | 99.188                                                                                                                                      | 1  | 99.1883  | 9.09159  | 0.094636         |
| (2) <i>t</i><br>(min)(L) | 24.500                                                                                                                                      | 1  | 24.5000  | 2.24567  | 0.272723         |
| (3) <i>CXR</i><br>(%)(L) | 253.575                                                                                                                                     | 1  | 253.5752 | 23.24267 | 0.040433         |
| 1L by 2L                 | 7.762                                                                                                                                       | 1  | 7.7618   | 0.71145  | 0.487764         |
| 1L by 3L                 | 10.951                                                                                                                                      | 1  | 10.9512  | 1.00379  | 0.421923         |
| 2L by 3L                 | 39.694                                                                                                                                      | 1  | 39.6941  | 3.63835  | 0.196703         |
| <b>*Lack of<br/>Fit</b>  | 60.390                                                                                                                                      | 1  | 60.3900  | 5.53534  | <b>*0.142921</b> |
| Pure Error               | 21.820                                                                                                                                      | 2  | 10.9099  |          |                  |
| Total SS                 | 1179.996                                                                                                                                    | 10 |          |          |                  |

\*When  $p$ -value > 0.05, lack of fit of mathematical model is no significant.

**Supplementary Table 3.** ANOVA results for response conversion (%) evaluated in the experimental design.

| Factor                  | ANOVA; Var.:Conversion (%); $R^2=0.99627$ ; $R^2_{adj}=0.98756$ (Spreadsheet5) 3 factors. 1 Blocks. 11 Runs; MS Pure Error=2.192633 DV: Conversion (%) |    |          |          |                  |
|-------------------------|--------------------------------------------------------------------------------------------------------------------------------------------------------|----|----------|----------|------------------|
|                         | SS                                                                                                                                                     | df | MS       | $F$      | $p$ -value       |
| (1) $T$<br>(°C)(L)      | 7287.87                                                                                                                                                | 1  | 7287.866 | 3323.796 | 0.000301         |
| $T$<br>(°C)(Q)          | 1865.19                                                                                                                                                | 1  | 1865.193 | 850.663  | 0.001173         |
| (2) $t$<br>(min)(L)     | 401.86                                                                                                                                                 | 1  | 401.861  | 183.278  | 0.005412         |
| (3) $CXR$<br>(%)(L)     | 417.60                                                                                                                                                 | 1  | 417.605  | 190.458  | 0.005210         |
| 1L by 2L                | 206.05                                                                                                                                                 | 1  | 206.045  | 93.971   | 0.010475         |
| 1L by 3L                | 639.03                                                                                                                                                 | 1  | 639.031  | 291.445  | 0.003414         |
| 2L by 3L                | 0.66                                                                                                                                                   | 1  | 0.661    | 0.302    | 0.638018         |
| <b>*Lack of<br/>Fit</b> | 36.13                                                                                                                                                  | 1  | 36.125   | 16.476   | <b>*0.055675</b> |
| Pure<br>Error           | 4.39                                                                                                                                                   | 2  | 2.193    |          |                  |
| Total SS                | 10858.77                                                                                                                                               | 10 |          |          |                  |

\*When  $p$ -value > 0.05, lack of fit of mathematical model is no significant.

**Supplementary Table 4.** ANOVA results for response selectivity (%) evaluated in the 2<sup>3</sup> experimental design.

| ANOVA; Var.:Selectivity (%); $R^2=0.97024$ ; $R^2_{adj}=0.90079$ (Spreadsheet5) 3 factors. 1 Blocks.<br>11 Runs; MS Pure Error=11.85863 DV: Selectivity (%) |          |    |          |          |                  |
|-------------------------------------------------------------------------------------------------------------------------------------------------------------|----------|----|----------|----------|------------------|
| Factor                                                                                                                                                      | SS       | df | MS       | <i>F</i> | <i>p</i> -value  |
| (1) <i>T</i><br>(°C)(L)                                                                                                                                     | 282.388  | 1  | 282.388  | 23.8128  | 0.039521         |
| <i>T</i><br>(°C)(Q)                                                                                                                                         | 143.252  | 1  | 143.252  | 12.0800  | 0.073742         |
| (2) <i>t</i><br>(min)(L)                                                                                                                                    | 2.071    | 1  | 2.071    | 0.1746   | 0.716638         |
| (3) <i>CRX</i><br>(%)(L)                                                                                                                                    | 2768.052 | 1  | 2768.052 | 233.4208 | 0.004257         |
| 1L by 2L                                                                                                                                                    | 3.014    | 1  | 3.014    | 0.2541   | 0.664239         |
| 1L by 3L                                                                                                                                                    | 1117.936 | 1  | 1117.936 | 94.2719  | 0.010442         |
| 2L by 3L                                                                                                                                                    | 48.462   | 1  | 48.462   | 4.0866   | 0.180603         |
| <b>*Lack of<br/>Fit</b>                                                                                                                                     | 110.187  | 1  | 110.187  | 9.2917   | <b>*0.092873</b> |
| Pure<br>Error                                                                                                                                               | 23.717   | 2  | 11.859   |          |                  |
| Total SS                                                                                                                                                    | 4499.078 | 10 |          |          |                  |

\*When *p*-value > 0.05, lack of fit of mathematical model is no significant.

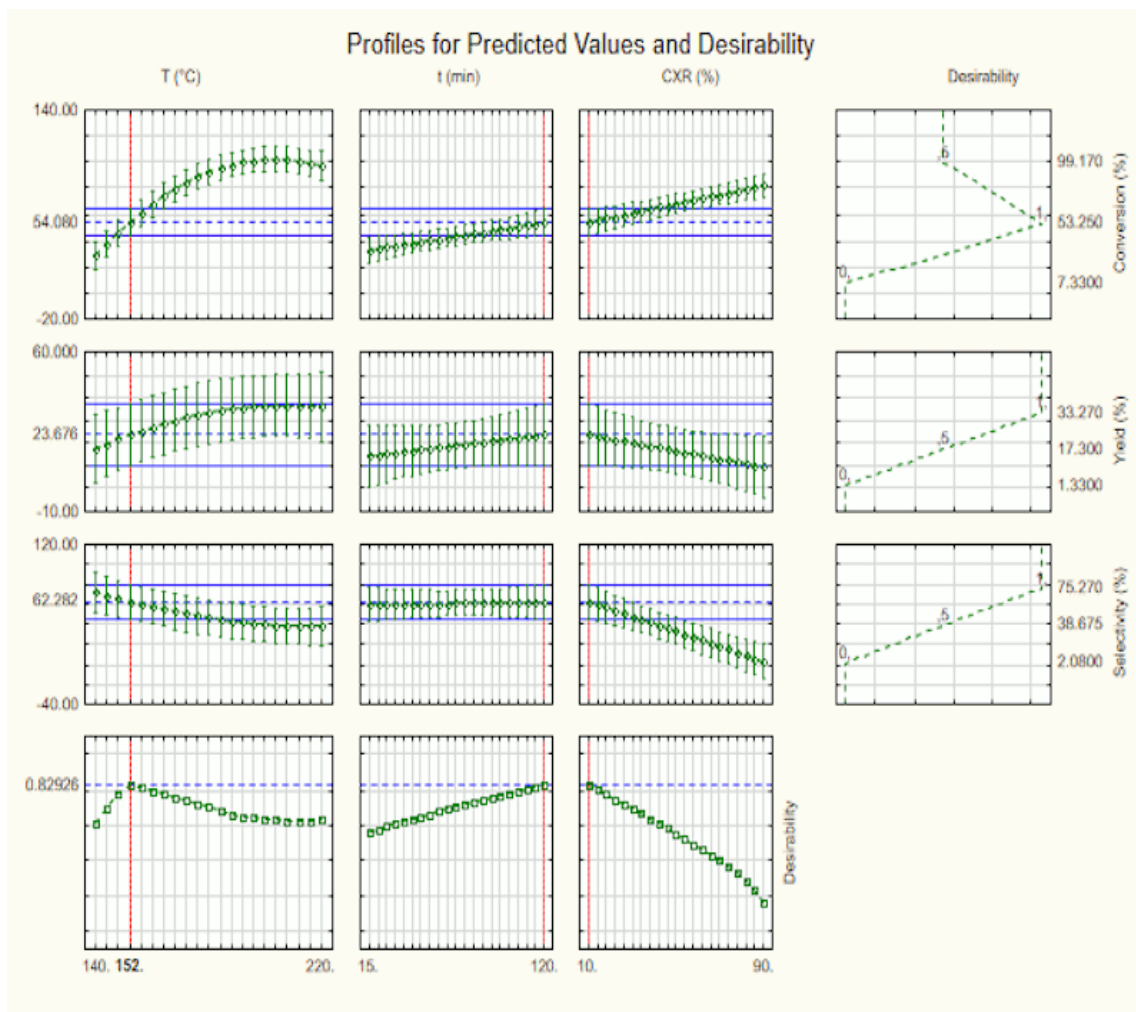

**Supplementary Figure 1.** Predicted values by the desirability tool for all responses studied.
